# Supplementary material for: ROS-Mediated Necroptosis Is Involved in Iron Overload-Induced Osteoblastic Cell Death
Source: Hindawi journal article supplement (doi:10.1155/2020/1295382), 2020-10-16

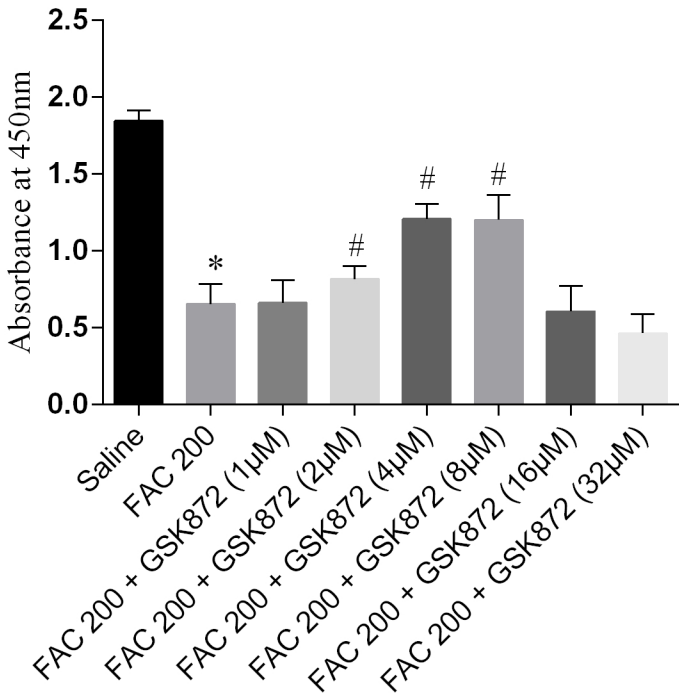

Supplement: f2 [file 1295382.f2.pdf]
